# Supplementary material for: Synthesis and characteristics of novel energetic salts based on bis(N-dinitroethyl)aminofurazan
Source: Royal Society of Chemistry journal article supplement (doi:10.1039/c3ta11784g), 2013-01-01
Supplement: c3ta11784g.pdf [file c3ta11784g.pdf]

## Supporting Information

# Synthesis and characteristics of novel energetic salts based on bis(*N*-dinitroethyl)aminofurazan

Lixuan Liang<sup>a</sup>, Dan Cao<sup>a</sup>, Jinhong Song<sup>a</sup>, Haifeng Huang<sup>a</sup>, Kai Wang<sup>a</sup>,  
Chengming Bian<sup>a</sup>, Xiao Dong<sup>a</sup>, Zhiming Zhou<sup>\*a, b</sup>

<sup>†</sup>School of Chemical Engineering and the Environment and State Key Laboratory of Explosion

<sup>‡</sup>Science and Technology, Beijing Institute of Technology, Beijing 100081, R. P. China

E-mail: zzm@bit.edu.cn

### Table of contents

S2 X-ray crystallography

S2-S3 Table S1 Band angles and dihedral angles for the structure of **7**

S3-S5 Geometry coordinates

S6 Table S2 Ab Initio computational data

S6 References

**X-ray crystallography:** Crystals of **7** was removed from the flask and covered with a layer of hydrocarbon oil. A suitable crystal was then selected, attached to a glass fiber, and placed in the low-temperature nitrogen stream. Data for **7** was collected at 153(2) K using a Rigaku Saturn724 CCD (AFC10/Saturn724+ for **7**) diffractometer equipped with a graphite-monochromatized MoK $\alpha$  radiation ( $\lambda = 0.71073 \text{ \AA}$ ) using omega scans. Data collection and reduction were performed and the unit cell was initially refined by using CrystalClear -SM Expert 2.0 r2<sup>i</sup> software. The reflection data were also corrected for Lp factors. The structure was solved by direct methods and refined by the least squares method on F2 using the SHELXTL-97 system of programs.<sup>ii</sup> Structure was solved in the space group  $P\bar{1}$  by analysis of systematic absences. In this all-light-atom structure the value of the Flack parameter did not allow the direction of polar axis to be determined and Friedel reflections were then merged for the final refinement. Band angles and dihedral angles of the data collection and refinement are given in Table S1.

Table S1. Band angles and dihedral angles for the structure of **7**.

|             |            |               |            |
|-------------|------------|---------------|------------|
| N1—O1—N2    | 110.24(18) | C2—N3—H3N     | 109.6(17)  |
| H0A—O10—H0B | 108.5      | C3—N3—H3N     | 127.4(17)  |
| N1—C1—N6    | 124.7(2)   | O3—N4—O2      | 120.17(19) |
| N1—C1—C2    | 109.7(2)   | O3—N4—C4      | 122.9(2)   |
| N6—C1—C2    | 125.6(2)   | O2—N4—C4      | 116.94(19) |
| N2—C2—N3    | 125.6(2)   | O4—N5—O5      | 120.12(19) |
| N2—C2—C1    | 109.1(2)   | O4—N5—C4      | 124.51(19) |
| N3—C2—C1    | 125.3(2)   | O5—N5—C4      | 115.37(19) |
| N3—C3—C4    | 113.38(19) | C1—N6—C5      | 122.9(2)   |
| N3—C3—H3A   | 108.9      | C1—N6—H6N     | 114.1(18)  |
| C4—C3—H3A   | 108.9      | C5—N6—H6N     | 122.9(18)  |
| N3—C3—H3B   | 108.9      | O7—N7—O6      | 120.47(19) |
| C4—C3—H3B   | 108.9      | O7—N7—C6      | 124.09(19) |
| H3A—C3—H3B  | 107.7      | O6—N7—C6      | 115.44(19) |
| N5—C4—N4    | 120.8(2)   | O8—N8—O9      | 119.44(18) |
| N5—C4—C3    | 118.5(2)   | O8—N8—C6      | 123.04(19) |
| N4—C4—C3    | 120.7(2)   | O9—N8—C6      | 117.52(19) |
| N6—C5—C6    | 114.64(19) | C7—N9—H9A     | 117(2)     |
| N6—C5—H5A   | 108.6      | C7—N9—H9B     | 123(2)     |
| C6—C5—H5A   | 108.6      | H9A—N9—H9B    | 120(3)     |
| N6—C5—H5B   | 108.6      | C7—N10—H10A   | 119(3)     |
| C6—C5—H5B   | 108.6      | C7—N10—H10B   | 117(2)     |
| H5A—C5—H5B  | 107.6      | H10A—N10—H10B | 124(3)     |
| N8—C6—N7    | 120.8(2)   | C7—N11—H11A   | 117(2)     |
| N8—C6—C5    | 120.9(2)   | C7—N11—H11B   | 121(2)     |
| N7—C6—C5    | 118.18(19) | H11A—N11—H11B | 121(3)     |

|             |           |               |           |
|-------------|-----------|---------------|-----------|
| N10—C7—N11  | 120.4(2)  | C8—N12—H12A   | 123.9(19) |
| N10—C7—N9   | 119.3(2)  | C8—N12—H12B   | 118(2)    |
| N11—C7—N9   | 120.3(2)  | H12A—N12—H12B | 117(3)    |
| N13—C8—N14  | 119.9(2)  | C8—N13—H13A   | 116(2)    |
| N13—C8—N12  | 120.1(2)  | C8—N13—H13B   | 117(2)    |
| N14—C8—N12  | 120.0(2)  | H13A—N13—H13B | 127(3)    |
| C1—N1—O1    | 105.2(2)  | C8—N14—H14A   | 119(3)    |
| C2—N2—O1    | 105.7(2)  | C8—N14—H14B   | 121(3)    |
| N4—N5—N6—C3 | -0.26(16) | N5—N6—C3—N3   | 0.17(16)  |
| C2—N3—C3    | 122.6(2)  | H14A—N14—H14B | 119(4)    |
| N1—C1—C2—N2 | -0.8(3)   | C3—C4—N4—O3   | 177.1(2)  |
| N6—C1—C2—N2 | 179.6(2)  | N5—C4—N4—O2   | 178.2(2)  |
| N1—C1—C2—N3 | -180.0(2) | C3—C4—N4—O2   | -2.9(3)   |
| N6—C1—C2—N3 | 0.4(4)    | N4—C4—N5—O4   | 0.1(3)    |
| N3—C3—C4—N5 | -69.8(3)  | C3—C4—N5—O4   | -178.9(2) |
| N3—C3—C4—N4 | 111.3(2)  | N4—C4—N5—O5   | 180.0(2)  |
| N6—C5—C6—N8 | -116.7(2) | C3—C4—N5—O5   | 1.0(3)    |
| N6—C5—C6—N7 | 66.0(3)   | N1—C1—N6—C5   | 2.3(4)    |
| N6—C1—N1—O1 | -179.5(2) | C2—C1—N6—C5   | -178.1(2) |
| C2—C1—N1—O1 | 0.9(3)    | C6—C5—N6—C1   | 63.2(3)   |
| N2—O1—N1—C1 | -0.7(3)   | N8—C6—N7—O7   | 1.6(3)    |
| N3—C2—N2—O1 | 179.5(2)  | C5—C6—N7—O7   | 178.9(2)  |
| C1—C2—N2—O1 | 0.3(3)    | N8—C6—N7—O6   | -178.3(2) |
| N1—O1—N2—C2 | 0.3(3)    | C5—C6—N7—O6   | -1.0(3)   |
| N2—C2—N3—C3 | 1.6(4)    | N7—C6—N8—O8   | 0.2(3)    |
| C1—C2—N3—C3 | -179.3(2) | C5—C6—N8—O8   | -177.0(2) |
| C4—C3—N3—C2 | 117.4(2)  | N7—C6—N8—O9   | 179.9(2)  |
| N5—C4—N4—O3 | -1.8(3)   | C5—C6—N8—O9   | 2.7(3)    |

**Theoretical study:** Calculations were carried out by using the Gaussian 03 (Revision E.01) suite of programs.<sup>1</sup> The geometric optimization of the structures and frequency analyses were carried out by using the B3LYP functional with the 6-31+G\*\* basis set,<sup>2</sup> and single-point energies were calculated at the MP2(full)/6-311++G\*\* level. All of the optimized structures were characterized to be true local energy minima on the potential-energy surface without imaginary frequencies.

### Geometry coordinates

The optimized structure of the following structure

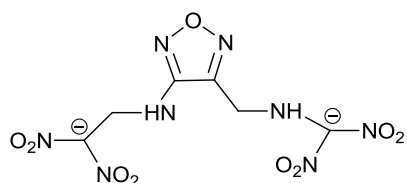

|   |           |           |           |
|---|-----------|-----------|-----------|
| O | 0.464221  | 3.185415  | -0.737204 |
| C | -0.549862 | 1.332506  | -0.288509 |
| C | 0.837945  | 1.254948  | 0.159481  |
| N | -0.747043 | 2.503006  | -0.844319 |
| N | 1.436427  | 2.384874  | -0.129323 |
| N | -1.534395 | 0.395313  | -0.080408 |
| H | -1.249128 | -0.573743 | -0.189649 |
| N | 1.399163  | 0.221910  | 0.858024  |
| H | 1.031121  | -0.709752 | 0.708329  |
| C | -2.853271 | 0.632659  | -0.698472 |
| H | -2.775387 | 0.525099  | -1.791224 |
| H | -3.145616 | 1.655767  | -0.475291 |
| C | 2.808513  | 0.223106  | 1.266262  |
| H | 2.845409  | -0.231780 | 2.265196  |
| H | 3.142831  | 1.254917  | 1.346872  |
| C | -3.919968 | -0.281068 | -0.175367 |
| C | 3.758980  | -0.501191 | 0.347045  |
| N | -4.992444 | 0.237713  | 0.555627  |
| O | -5.047587 | 1.496841  | 0.685783  |
| O | -5.859346 | -0.499349 | 1.072173  |
| N | -3.833958 | -1.630906 | -0.497903 |
| O | -2.748167 | -1.978987 | -1.068279 |
| O | -4.740427 | -2.460144 | -0.282414 |
| N | 4.948112  | 0.120534  | -0.049523 |
| O | 5.703606  | -0.378473 | -0.909011 |
| O | 5.227682  | 1.222879  | 0.508109  |
| N | 3.533042  | -1.850607 | 0.113637  |
| O | 2.470947  | -2.323263 | 0.643124  |
| O | 4.303374  | -2.584810 | -0.538225 |

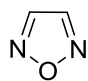

|   |           |           |           |
|---|-----------|-----------|-----------|
| O | -0.768830 | -0.794977 | -0.032344 |
|---|-----------|-----------|-----------|

|   |           |           |           |
|---|-----------|-----------|-----------|
| C | -0.012025 | 1.097718  | -0.106360 |
| C | 1.225138  | 0.292063  | -0.015933 |
| H | 0.133000  | 2.443525  | 0.226355  |
| H | 2.530927  | 0.662188  | 0.101932  |
| N | -1.279744 | 0.368556  | 0.061439  |
| N | 0.738035  | -1.094925 | 0.033449  |

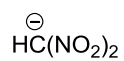

|   |           |           |           |
|---|-----------|-----------|-----------|
| C | -6.568211 | 0.113431  | 0.245351  |
| N | -5.759917 | 1.225093  | 0.122244  |
| O | -6.351687 | 2.339781  | 0.277897  |
| O | -4.536838 | 1.159207  | -0.123328 |
| N | -6.177358 | -1.204282 | 0.122242  |
| O | -7.107273 | -2.057497 | 0.277908  |
| O | -5.002440 | -1.550446 | -0.123330 |
| H | -7.605684 | 0.291699  | 0.457303  |

Table S2. Ab Initio computational data ( B3LYP/6-31+G(d,p)/MP2(full)/6-311++G\*\*)

|                                                                                   | $E_0$        | ZPE      | $H_T$    | HOF <sup>Exp</sup>    | HOF <sup>Calcd</sup> |
|-----------------------------------------------------------------------------------|--------------|----------|----------|-----------------------|----------------------|
| 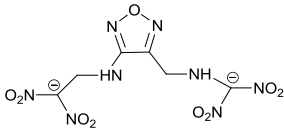 | -1344.192081 | 0.177415 | 0.021583 | -                     | -122.3               |
| $\ominus\text{HC}(\text{NO}_2)_2$                                                 | -448.1640811 | 0.039725 | 0.00688  | -                     | -222.8               |
|  | -261.5324597 | 0.045703 | 0.004418 | 196 <sup>[a]</sup>    | -                    |
| $\text{CH}_4$                                                                     | -40.39849    | 0.044791 | 0.003812 | -74.6 <sup>[b]</sup>  | -                    |
| $\text{CH}_3\text{CH}_3$                                                          | -79.6068548  | 0.074609 | 0.00443  | -84.68 <sup>[c]</sup> | -                    |
| $\text{CH}_3\text{NH}_2$                                                          | -95.6318759  | 0.064032 | 0.004369 | -23.0 <sup>[b]</sup>  | -                    |
| $\text{NH}_3$                                                                     | -56.43462    | 0.034377 | 0.003818 | -45.9 <sup>[b]</sup>  | -                    |

<sup>[a]</sup> Struct Chem. **2011**, 22, 149-159 <sup>[b]</sup>Eur. J. Inorg. Chem. **2008**, 2560-2568; <sup>[c]</sup>Data calculated with the G2 method by using the Gaussian 03 program. 32, 317-322

#### References:

- (1) Gaussian 03, Revision E.01, M. J.Frisch, G. W.Trucks, H. B.Schlegel, G. E.Scuseria, M. A.Robb, J. R.Cheeseman, J. A.Montgomery, J. T.Vreven, K. N.Kudin, J. C.Burant, J. M.Millam, S. S.Iyengar, J.Tomasi, V.Barone, B.Mennucci, M.Cossi, G.Scalmani, N.Regga, G. A. Petersson, H. Nakatsuji, M. Hada, M. Ehara, K. Toyota, R. Fukuda, J. Hasegawa, M. Ishida, T. Nakajima, Y. Honda, O. Kitao, H. Nakai, M. Klene, X. Li, J. E. Knox, H. P. Hratchian, J. B. Cross, V. Bakken, C. Adamo, J. Jaramillo, R. Gomperts, R. E. Stratmann, O. Yazyev, A. J. Austin, R. Cammi, C. Pomelli, J. W. Ochterski, P. Y. Ayala, K. Morokuma, G. A. Voth, P. Salvador, J. J. Dannenberg, V. G. Zakrzewski, S. Dapprich, A. D. Daniels, M. C. Strain, O. Farkas, D. K. Malick, A. D. Rabuck, K. Raghavachari, J. B. Foresman, J. V. Ortiz, Q. Cui, A. G. Baboul, S. Clifford, J. Cioslowski, B. B. Stefanov, G. Liu, A. Liashenko, P. Piskorz, I. Komaromi, R. L. Martin, D. J. Fox, T. Keith, M. A. Al-Laham, C. Y. Peng, A. Nanayakkara, M. Challacombe, P. M. W. Gill, B. Johnson, W. Chen, M. W. Wong, C. Gonzalez, J. A. Pople, Gaussian, Inc., Wallingford CT, **2004**.
- (2) R. G. Parr, W. Yang, *Density Functional Theory of Atoms and Molecules*, Oxford University Press, New York, **1989**.

<sup>i</sup> CrystalClear: SM Expert 2.0 r2, An Integrated Program for the Collection and Processing of Area Detector Data, Rigaku Corporation, 2009.

<sup>ii</sup> G. M. Sheldrick, SHELXTL-97, Structure Determination Software Suite. Bruker AXS, Madison WI, 2008.
